# Supplementary material for: Infrared characterization of the products and the rate coefficient of the reaction between Criegee intermediate CH2OO and HCl
Source: Royal Society of Chemistry journal article supplement (doi:10.1039/d1cp00011j), 2021-01-01
Supplement: d1cp00011j1.pdf [file d1cp00011j1.pdf]

Electronic Supplementary Information

**Infrared characterization of the products and the rate coefficient of the reaction  
between Criegee intermediate CH<sub>2</sub>OO and HCl**

Wei-Che Liang,<sup>a</sup> Pei-Ling Luo,<sup>\*ab</sup> and Yuan-Pern Lee<sup>\*abc</sup>

<sup>a</sup> *Department of Applied Chemistry and Institute of Molecular Science, National Yang Ming Chiao Tung University, Hsinchu 300093, Taiwan.*

<sup>b</sup> *Institute of Atomic and Molecular Sciences, Academia Sinica, Taipei 106319, Taiwan.*

<sup>c</sup> *Center for Emergent Functional Matter Science, National Chiao Tung University, Hsinchu 300093, Taiwan.*

*\*E-mail: plluo@gate.sinica.edu.tw (P.-L. Luo)*

*\*E-mail: yplee@nycu.edu.tw (Y.-P. Lee)*

ESI includes 1 note, 6 tables, and 10 figures.

## Note S1. Simulation of Bands A<sub>2</sub>–A<sub>4</sub> of *gauche*-CMHP

With the PGOPHER program,<sup>1</sup> we simulated the fundamental band of each vibrational mode by using rotational parameters  $A''$ ,  $B''$ , and  $C''$ , ratios of rotational parameters  $A'/A''$ ,  $B'/B''$ , and  $C'/C''$  and  $a/b/c$  type ratios of each mode predicted with the B3LYP/aug-cc-pVTZ-pp method, as listed in Tables S3 and S4 (ESI†),  $J_{\max} = 200$ ,  $T = 298$  K, and a Gaussian width  $0.32$   $\text{cm}^{-1}$  (corresponding to the instrument resolution  $0.25$   $\text{cm}^{-1}$  after apodization). The projections of the dipole derivatives for each vibrational mode of *gauche*-CMHP onto rotational axes  $a$ ,  $b$  and  $c$  determine the weighting of bands of types  $a$ ,  $b$ , and  $c$  in each vibrational absorption band. For an improved simulation, we employed ratios of calculated rotational parameters  $A'/A''$ ,  $B'/B''$ , and  $C'/C''$  and experimental values of  $A''$ ,  $B''$ , and  $C''$  derived from microwave experiments by Cabezas and Endo,<sup>2</sup> Simulated  $a/b/c$ -type spectra and the resultant rotational contours for  $\nu_5$ ,  $\nu_6$ ,  $\nu_8$ , and  $\nu_{10}$  of *gauche*-<sup>35</sup>Cl-CMHP are shown in Fig. S4 (ESI†).

Because information was lacking, we assumed that the rotational contours and the IR intensities of the hot bands are the same as the fundamental band. The contours of the hot bands were consequently derived from the fundamental band with intensities scaled according to a Boltzmann distribution and positions shifted according to anharmonicity; the shifts depend on the difference in transition wavenumbers between the fundamental band and the hot bands. We calculated, as initial estimates, the Boltzmann distributions of the excited states of the low-energy modes according to the predicted anharmonic vibrational energies; the shifts among hot bands in a series were initially assumed to be constant. For *gauche*-CMHP, the two least-energy vibrational modes  $\nu_{14}$  and  $\nu_{15}$  were considered; their  $\nu = 1$  states have energies  $150$  and  $284$   $\text{cm}^{-1}$ , respectively, above the ground state. A least-squares fit was performed on systematically varying these parameters within limited ranges in position ( $\leq 5$   $\text{cm}^{-1}$ ) and intensities (within  $\pm 10\%$ ) for each band. It should be noted that the decomposition of observed spectra to several series of transitions is not unique; such decomposition is

only used as an attempt to explain that the observed broad rotational contours might be due to contributions of the hot bands and isotopic species.

For band A<sub>2</sub>, contributions from the fundamental band  $\nu_8$ ,  $8_0^1$ , hot bands associated with  $\nu_{15}$ ,  $8_0^1 15_a^a$  with  $a = 1-4$ , and  $\nu_{14}$ ,  $8_0^1 14_a^a$  with  $a = 1-2$ , were considered, as shown in Fig. S7(b), ESI†. Furthermore, *gauche*-<sup>37</sup>Cl-CMHP also contribute, with  $8_0^1$ ,  $8_0^1 15_a^a$  with  $a = 1-3$ , and  $8_0^1 14_1^1$ ; a red shift of  $1.2 \text{ cm}^{-1}$  from *gauche*-<sup>35</sup>Cl-CMHP for  $8_0^1$  was predicted from calculation, as shown in Fig. S7(c), ESI†. For the simulation of bands A<sub>3</sub> and A<sub>4</sub>, we did not include contributions of *gauche*-<sup>37</sup>Cl-CMHP for simplicity.

**Table S1** Harmonic and anharmonic vibrational wavenumbers ( $\text{cm}^{-1}$ ) and IR intensities ( $\text{km mol}^{-1}$ ) of *gauche*-CMHP and *anti*-CMHP calculated with B3LYP/aug-cc-pVTZ

| Mode            | <i>gauche</i> -CMHP |            | <i>anti</i> -CMHP |            |
|-----------------|---------------------|------------|-------------------|------------|
|                 | Harmonic            | Anharmonic | Harmonic          | Anharmonic |
| v <sub>1</sub>  | 3717 (36)           | 3539       | 3748 (56)         | 3565       |
| v <sub>2</sub>  | 3170 (1)            | 3022       | 3125 (10)         | 2978       |
| v <sub>3</sub>  | 3091 (9)            | 2971       | 3059 (21)         | 2885       |
| v <sub>4</sub>  | 1456 (2)            | 1417       | 1511 (3)          | 1472       |
| v <sub>5</sub>  | 1391 (58)           | 1353       | 1371 (16)         | 1361       |
| v <sub>6</sub>  | 1322 (39)           | 1292       | 1340 (73)         | 1291       |
| v <sub>7</sub>  | 1267 (9)            | 1236       | 1209 (3)          | 1182       |
| v <sub>8</sub>  | 1079 (87)           | 1047       | 1050 (44)         | 1018       |
| v <sub>9</sub>  | 996 (1)             | 977        | 1004 (0)          | 992        |
| v <sub>10</sub> | 878 (20)            | 855        | 921 (9)           | 897        |
| v <sub>11</sub> | 664 (131)           | 655        | 781 (90)          | 761        |
| v <sub>12</sub> | 494 (23)            | 484        | 398 (1)           | 392        |
| v <sub>13</sub> | 366 (7)             | 359        | 271 (7)           | 317        |
| v <sub>14</sub> | 260 (107)           | 284        | 240 (106)         | 137        |
| v <sub>15</sub> | 143 (19)            | 150        | 93 (4)            | 85         |

**Table S2** Harmonic and anharmonic vibrational wavenumbers ( $\text{cm}^{-1}$ ) and IR intensities ( $\text{km mol}^{-1}$ ) of *gauche*-MCP and  $\text{CH}_2\text{ClO}$  calculated with B3LYP/aug-cc-pVTZ

| Mode       | <i>gauche</i> -MCP |            | $\text{CH}_2\text{ClO}$ |            |
|------------|--------------------|------------|-------------------------|------------|
|            | Harmonic           | Anharmonic | Harmonic                | Anharmonic |
| $\nu_1$    | 3128 (7)           | 2983       | 2942 (4)                | 2731       |
| $\nu_2$    | 3105 (19)          | 2960       | 2914 (38)               | 2723       |
| $\nu_3$    | 3028 (20)          | 2949       | 1308 (57)               | 1312       |
| $\nu_4$    | 1500 (13)          | 1498       | 1226 (10)               | 1166       |
| $\nu_5$    | 1467 (9)           | 1425       | 1136 (48)               | 1115       |
| $\nu_6$    | 1445 (2)           | 1431       | 1035 (0)                | 1008       |
| $\nu_7$    | 1202 (3)           | 1173       | 648 (160)               | 627        |
| $\nu_8$    | 1167 (2)           | 1139       | 647 (2)                 | 752        |
| $\nu_9$    | 986 (33)           | 952        | 381 (5)                 | 371        |
| $\nu_{10}$ | 845 (23)           | 828        |                         |            |
| $\nu_{11}$ | 600 (44)           | 583        |                         |            |
| $\nu_{12}$ | 477 (1)            | 470        |                         |            |
| $\nu_{13}$ | 349 (8)            | 346        |                         |            |
| $\nu_{14}$ | 201 (2)            | 180        |                         |            |
| $\nu_{15}$ | 140 (2)            | 137        |                         |            |

**Table S3** Rotational parameters (in  $\text{cm}^{-1}$ ) of the ground state and vibrationally excited states ( $v = 1$ ) of *gauche*-CMHP, *anti*-CMHP, and *gauche*-MCP predicted with the B3LYP/aug-cc-pVTZ method

| Mode                | <i>gauche</i> -CMHP |            |            | <i>anti</i> -CMHP |            |            | <i>gauche</i> -MCP |            |            |
|---------------------|---------------------|------------|------------|-------------------|------------|------------|--------------------|------------|------------|
|                     | <i>A'</i>           | <i>B'</i>  | <i>C'</i>  | <i>A'</i>         | <i>B'</i>  | <i>C'</i>  | <i>A'</i>          | <i>B'</i>  | <i>C'</i>  |
| $v_1$               | 0.486               | 0.114      | 0.099      | 1.178             | 0.087      | 0.083      | 0.569              | 0.114      | 0.103      |
| $v_2$               | 0.487               | 0.114      | 0.099      | 1.180             | 0.087      | 0.083      | 0.568              | 0.114      | 0.103      |
| $v_3$               | 0.487               | 0.114      | 0.099      | 1.179             | 0.087      | 0.083      | 0.568              | 0.114      | 0.103      |
| $v_4$               | 0.488               | 0.113      | 0.099      | 1.177             | 0.087      | 0.083      | 0.570              | 0.114      | 0.103      |
| $v_5$               | 0.488               | 0.113      | 0.099      | 1.181             | 0.087      | 0.082      | 0.577              | 0.114      | 0.103      |
| $v_6$               | 0.487               | 0.113      | 0.099      | 1.179             | 0.087      | 0.082      | 0.556              | 0.114      | 0.103      |
| $v_7$               | 0.486               | 0.114      | 0.099      | 1.176             | 0.087      | 0.083      | 0.569              | 0.114      | 0.103      |
| $v_8$               | 0.487               | 0.113      | 0.099      | 1.184             | 0.086      | 0.082      | 0.564              | 0.114      | 0.103      |
| $v_9$               | 0.486               | 0.113      | 0.099      | 1.171             | 0.086      | 0.082      | 0.564              | 0.113      | 0.103      |
| $v_{10}$            | 0.487               | 0.113      | 0.099      | 1.179             | 0.086      | 0.082      | 0.568              | 0.113      | 0.103      |
| $v_{11}$            | 0.488               | 0.113      | 0.099      | 1.177             | 0.086      | 0.082      | 0.565              | 0.113      | 0.103      |
| $v_{12}$            | 0.487               | 0.113      | 0.099      | 1.185             | 0.086      | 0.082      | 0.569              | 0.113      | 0.103      |
| $v_{13}$            | 0.488               | 0.113      | 0.099      | 1.208             | 0.087      | 0.082      | 0.567              | 0.113      | 0.103      |
| $v_{14}$            | 0.488               | 0.113      | 0.099      | 1.186             | 0.087      | 0.082      | 0.570              | 0.113      | 0.103      |
| $v_{15}$            | 0.493               | 0.113      | 0.099      | 1.145             | 0.087      | 0.083      | 0.577              | 0.113      | 0.103      |
|                     | <i>A''</i>          | <i>B''</i> | <i>C''</i> | <i>A''</i>        | <i>B''</i> | <i>C''</i> | <i>A''</i>         | <i>B''</i> | <i>C''</i> |
| $v = 0$             | 0.488               | 0.113      | 0.099      | 1.181             | 0.087      | 0.083      | 0.568              | 0.114      | 0.103      |
| scaled <sup>a</sup> | 0.479               | 0.120      | 0.103      | 1.159             | 0.092      | 0.086      | 0.557              | 0.112      | 0.101      |

<sup>a</sup>The rotational parameters scaled with those derived from the microwave spectrum of *gauche*-CMHP.<sup>2</sup>

**Table S4** Ratios of *a*-, *b*-, and *c*-types of vibrational bands for each vibrational mode of *gauche*-CMHP, *anti*-CMHP, and *gauche*-MCP predicted with the B3LYP/aug-cc-pVTZ method

| Mode            | <i>gauche</i> -CMHP |          |          | <i>anti</i> -CMHP |          |          | <i>gauche</i> -MCP |          |          |
|-----------------|---------------------|----------|----------|-------------------|----------|----------|--------------------|----------|----------|
|                 | <i>a</i>            | <i>b</i> | <i>c</i> | <i>a</i>          | <i>b</i> | <i>c</i> | <i>a</i>           | <i>b</i> | <i>c</i> |
| v <sub>1</sub>  | 0.00                | 0.80     | 0.20     | 0.53              | 0.08     | 0.39     | 0.01               | 0.00     | 0.99     |
| v <sub>2</sub>  | 0.25                | 0.12     | 0.63     | 0.00              | 0.00     | 0.99     | 0.51               | 0.25     | 0.24     |
| v <sub>3</sub>  | 0.04                | 0.62     | 0.34     | 0.00              | 0.96     | 0.03     | 0.39               | 0.43     | 0.18     |
| v <sub>4</sub>  | 0.02                | 0.12     | 0.87     | 0.85              | 0.14     | 0.01     | 0.82               | 0.00     | 0.18     |
| v <sub>5</sub>  | 0.31                | 0.64     | 0.05     | 0.97              | 0.03     | 0.01     | 0.13               | 0.63     | 0.24     |
| v <sub>6</sub>  | 0.90                | 0.06     | 0.04     | 0.87              | 0.12     | 0.00     | 0.59               | 0.40     | 0.01     |
| v <sub>7</sub>  | 0.59                | 0.13     | 0.28     | 0.25              | 0.04     | 0.71     | 0.17               | 0.40     | 0.43     |
| v <sub>8</sub>  | 0.92                | 0.01     | 0.07     | 0.43              | 0.57     | 0.00     | 0.44               | 0.36     | 0.20     |
| v <sub>9</sub>  | 0.08                | 0.50     | 0.42     | 0.42              | 0.12     | 0.47     | 0.66               | 0.19     | 0.15     |
| v <sub>10</sub> | 0.87                | 0.04     | 0.09     | 0.75              | 0.24     | 0.01     | 0.66               | 0.31     | 0.03     |
| v <sub>11</sub> | 0.82                | 0.17     | 0.01     | 0.98              | 0.02     | 0.00     | 0.95               | 0.05     | 0.00     |
| v <sub>12</sub> | 1.00                | 0.00     | 0.00     | 0.68              | 0.28     | 0.04     | 0.06               | 0.92     | 0.02     |
| v <sub>13</sub> | 0.59                | 0.30     | 0.11     | 0.41              | 0.51     | 0.08     | 0.89               | 0.09     | 0.02     |
| v <sub>14</sub> | 0.45                | 0.00     | 0.55     | 0.12              | 0.67     | 0.21     | 0.67               | 0.18     | 0.15     |
| v <sub>15</sub> | 0.79                | 0.20     | 0.01     | 0.48              | 0.49     | 0.04     | 0.44               | 0.56     | 0.00     |

**Table S5** Summary of experimental conditions and fitted rate coefficients

| Set <sup>a</sup> | Expt. | [CH <sub>2</sub> I <sub>2</sub> ] <sub>0</sub><br>/mTorr | [CH <sub>2</sub> I] <sub>0</sub><br>/10 <sup>13</sup> <sup>b</sup> | [CH <sub>2</sub> OO] <sub>0</sub><br>/10 <sup>13</sup> <sup>b</sup> | [HCl] <sub>0</sub><br>/10 <sup>14</sup> <sup>b</sup> | [O <sub>2</sub> ]<br>/Torr | <i>k</i> <sup>I</sup> , exponential fit<br>/10 <sup>3</sup> s <sup>-1</sup> | <i>k</i> <sup>I</sup> , model fit<br>/10 <sup>3</sup> s <sup>-1</sup> |
|------------------|-------|----------------------------------------------------------|--------------------------------------------------------------------|---------------------------------------------------------------------|------------------------------------------------------|----------------------------|-----------------------------------------------------------------------------|-----------------------------------------------------------------------|
| 1                | 1     | 10.6                                                     | 1.38                                                               | 1.10                                                                | 0.91                                                 | 5.2                        | 7.2                                                                         | 4.7                                                                   |
|                  | 2     | 10.6                                                     | 1.38                                                               | 1.10                                                                | 6.22                                                 | 5.2                        | 34.0                                                                        | 29.5                                                                  |
|                  | 3     | 10.6                                                     | 1.38                                                               | 1.10                                                                | 12.46                                                | 5.2                        | 66.2                                                                        | 60.8                                                                  |
|                  | 4     | 10.6                                                     | 1.38                                                               | 1.10                                                                | 1.53                                                 | 5.2                        | 10.9                                                                        | 7.6                                                                   |
|                  | 5     | 10.6                                                     | 1.38                                                               | 1.10                                                                | 3.09                                                 | 5.2                        | 18.1                                                                        | 15.1                                                                  |
| 2                | 6     | 10.0                                                     | 1.30                                                               | 1.03                                                                | 4.68                                                 | 5.2                        | 26.0                                                                        | 22.6                                                                  |
|                  | 7     | 10.0                                                     | 1.30                                                               | 1.03                                                                | 9.33                                                 | 5.2                        | 49.9                                                                        | 45.5                                                                  |
|                  | 8     | 10.0                                                     | 1.30                                                               | 1.03                                                                | 15.57                                                | 5.2                        | 79.3                                                                        | 73.0                                                                  |
|                  | 9     | 10.0                                                     | 1.30                                                               | 1.03                                                                | 7.78                                                 | 5.2                        | 42.2                                                                        | 38.2                                                                  |
| 3                | 10    | 16.6                                                     | 2.15                                                               | 1.70                                                                | 12.41                                                | 8.2                        | 65.1                                                                        | 58.4                                                                  |
|                  | 11    | 16.6                                                     | 2.15                                                               | 1.70                                                                | 2.50                                                 | 8.2                        | 16.0                                                                        | 12.5                                                                  |
|                  | 12    | 16.6                                                     | 2.15                                                               | 1.70                                                                | 4.94                                                 | 8.2                        | 29.0                                                                        | 25.4                                                                  |
|                  | 13    | 16.6                                                     | 2.15                                                               | 1.70                                                                | 19.88                                                | 8.2                        | 103.2                                                                       | 97.4                                                                  |
| 4                | 14    | 16.1                                                     | 2.09                                                               | 1.66                                                                | 1.45                                                 | 8.2                        | 10.3                                                                        | 6.9                                                                   |
|                  | 15    | 16.1                                                     | 2.09                                                               | 1.66                                                                | 7.49                                                 | 8.2                        | 40.1                                                                        | 36.9                                                                  |
|                  | 16    | 16.1                                                     | 2.09                                                               | 1.66                                                                | 14.92                                                | 8.2                        | 77.2                                                                        | 72.5                                                                  |
|                  | 17    | 16.1                                                     | 2.09                                                               | 1.66                                                                | 9.94                                                 | 8.2                        | 54.9                                                                        | 48.8                                                                  |

<sup>a</sup> For all experiments, a CH<sub>2</sub>OO line at 896.876 cm<sup>-1</sup> was probed and the photolysis beam has fluence 20 mJ cm<sup>-2</sup>. <sup>b</sup> in unit of molecule cm<sup>-3</sup>.



**Table S6** Kinetic model and rate coefficients employed in the fitting for CH<sub>2</sub>OO + HCl

| Reaction                                                                                        | Rate coefficient <sup>a</sup>                                                                           | Ref. |
|-------------------------------------------------------------------------------------------------|---------------------------------------------------------------------------------------------------------|------|
| $k_{1a}^b$ CH <sub>2</sub> I + O <sub>2</sub> → CH <sub>2</sub> OO + I                          | $\{1 - 0.47/(1 + 3.2 \times 10^{-18} [M])\} \times 1.6 \times 10^{-12} / (1 + 1.1 \times 10^{-19} [M])$ | 3    |
| $k_{1b}^b$ CH <sub>2</sub> I + O <sub>2</sub> → CH <sub>2</sub> IOO                             | $1.6 \times 10^{-12} - 1.6 \times 10^{-12} / (1 + 1.1 \times 10^{-19} [M])$                             | 3    |
| $k_{1c}^b$ CH <sub>2</sub> I + O <sub>2</sub> → CH <sub>2</sub> O + IO                          | $4.0 \times 10^{-13}$                                                                                   | 4    |
| $k_{1d}^b$ CH <sub>2</sub> I + O <sub>2</sub> → other products                                  | $1.6 \times 10^{-12} - k_{1a} - k_{1b} - k_{1c}$                                                        | 3    |
| $k_{2a}$ CH <sub>2</sub> OO + I → CH <sub>2</sub> I + O <sub>2</sub>                            | $55 \times 1.6 \times 10^{-12} / (1 + 1.1 \times 10^{-19} [M])$                                         | 3    |
| $k_{2b}$ CH <sub>2</sub> OO + I → CH <sub>2</sub> IOO                                           | $55 \times \{1.6 \times 10^{-12} - 1.6 \times 10^{-12} / (1 + 1.1 \times 10^{-19} [M])\}$               | 3    |
| $k_{2c}$ CH <sub>2</sub> OO + I → CH <sub>2</sub> O + IO                                        | $9.0 \times 10^{-12}$                                                                                   | 3    |
| $k_3$ CH <sub>2</sub> OO + CH <sub>2</sub> I → C <sub>2</sub> H <sub>4</sub> I + O <sub>2</sub> | $6.3 \times 10^{-11}$                                                                                   | 5    |
| $k_{\text{self}}$ CH <sub>2</sub> OO + CH <sub>2</sub> OO → 2CH <sub>2</sub> O + O <sub>2</sub> | $9.2 \times 10^{-11}$                                                                                   | 6    |
| $k_5$ IO + IO → I <sub>2</sub> + O <sub>2</sub>                                                 | $9.9 \times 10^{-11}$                                                                                   | 7    |
| $k_6$ CH <sub>2</sub> IOO + I → CH <sub>2</sub> IO + IO                                         | $3.5 \times 10^{-11}$                                                                                   | 8    |
| $k_7$ CH <sub>2</sub> IOO + CH <sub>2</sub> IOO → 2CH <sub>2</sub> IO + O <sub>2</sub>          | $9.0 \times 10^{-11}$                                                                                   | 8    |
| $k_8$ CH <sub>2</sub> IO → CH <sub>2</sub> O + I                                                | $10^6 \text{ s}^{-1}$                                                                                   | 8    |
| $k_9$ CH <sub>2</sub> OO + HCl → products                                                       | $k^1 = k_9 \times [\text{HCl}]_0$ , fitted                                                              |      |

<sup>a</sup> Rate coefficient in cm<sup>3</sup> molecule<sup>-1</sup> s<sup>-1</sup>, unless specified, [M] in molecule cm<sup>-3</sup>. <sup>b</sup>  $k_{1a} + k_{1b} + k_{1c} + k_{1d} = 1.6 \times 10^{-12} \text{ cm}^3 \text{ molecule}^{-1} \text{ s}^{-1}$ .

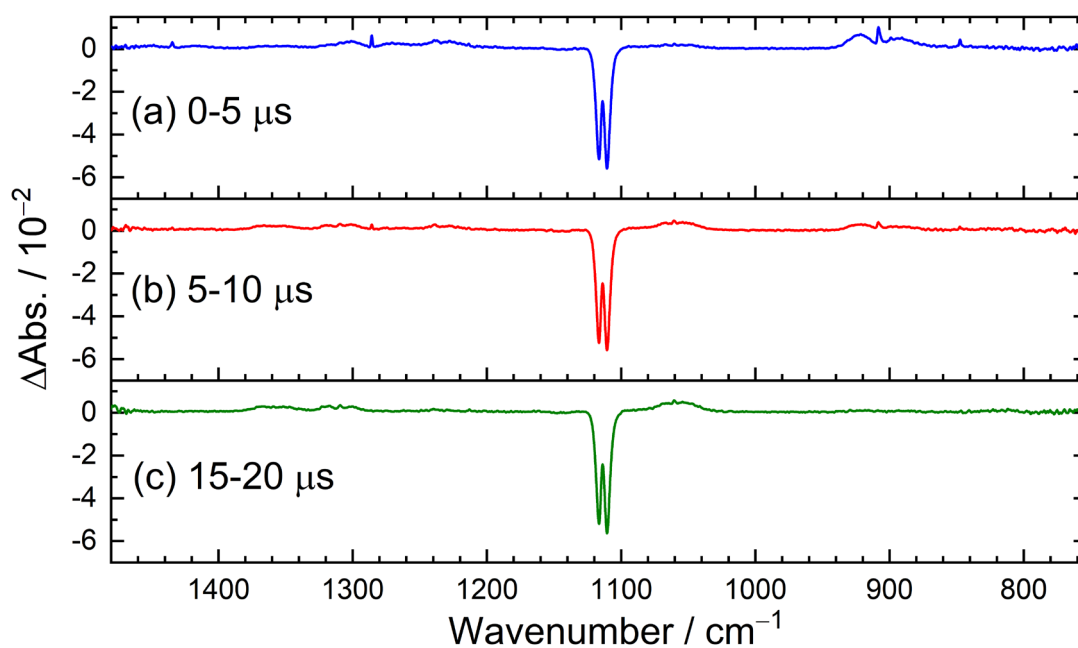

**Fig. S1** Difference spectra at resolution  $1.0 \text{ cm}^{-1}$  recorded upon photolysis at 308 nm of a flowing mixture of  $\text{CH}_2\text{I}_2/\text{HCl}/\text{N}_2/\text{O}_2$  (0.07/0.04/54.0/46.0,  $P_{\text{T}} = 100.1 \text{ Torr}$ , 298 K). (a)–(c) Spectra recorded 0–5, 5–10, and 15–20  $\mu\text{s}$  after irradiation, respectively.

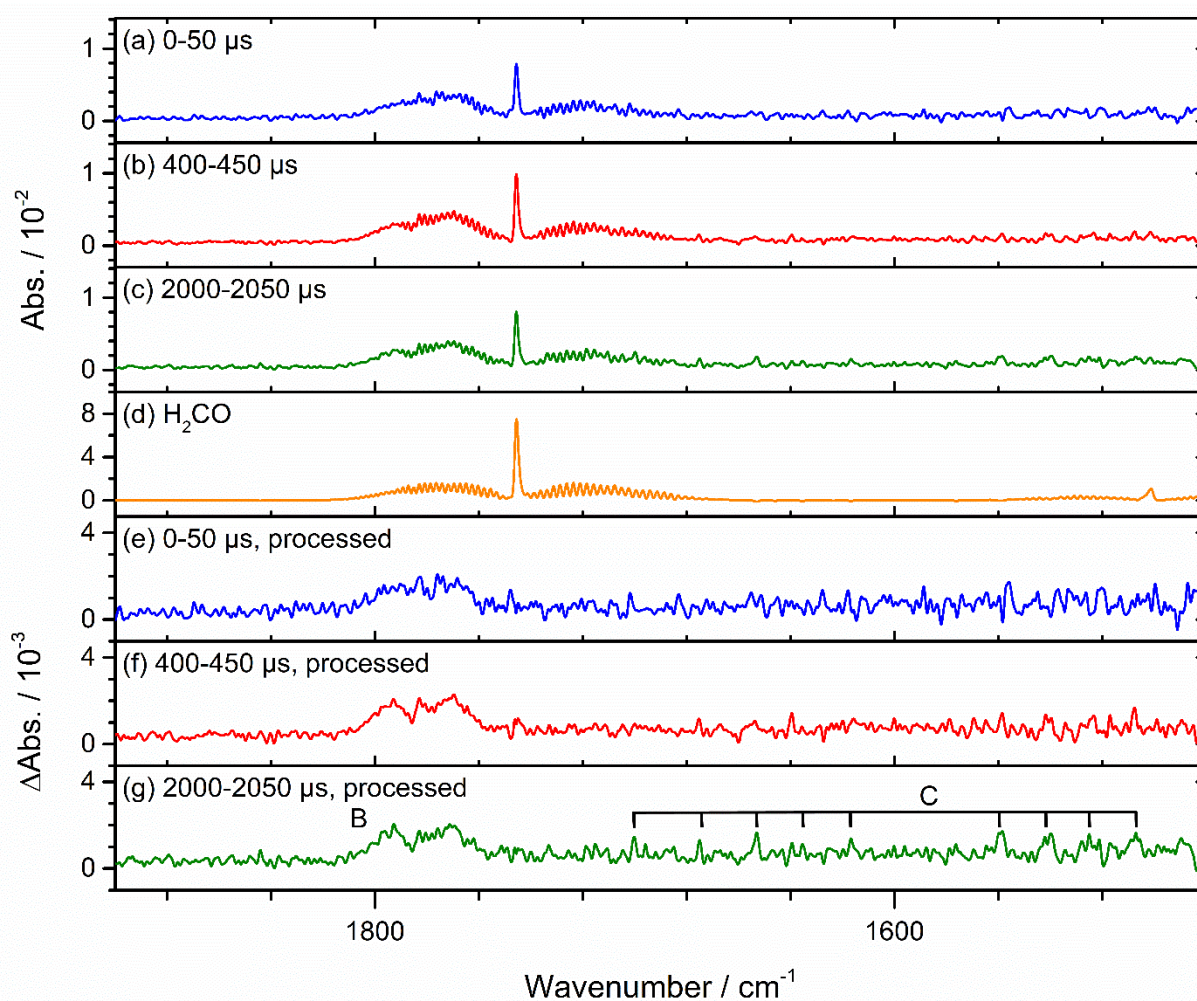

**Fig. S2** Difference absorbance spectra at resolution  $1.0 \text{ cm}^{-1}$  recorded upon photolysis at  $308 \text{ nm}$  of a flowing mixture of  $\text{CH}_2\text{I}_2/\text{HCl}/\text{N}_2/\text{O}_2$  (0.08/0.04/51.7/49.2,  $P_T = 101.0 \text{ Torr}$ ,  $298 \text{ K}$ ). (a)–(c) Spectra recorded 0–50, 400–450, and 2000–2050  $\mu\text{s}$  after irradiation, respectively. (d) IR spectrum of  $\text{H}_2\text{CO}$ . (e)–(g) Processed spectra of (a)–(c) with absorption of  $\text{H}_2\text{CO}$  subtracted; features B and lines of group C are indicated.

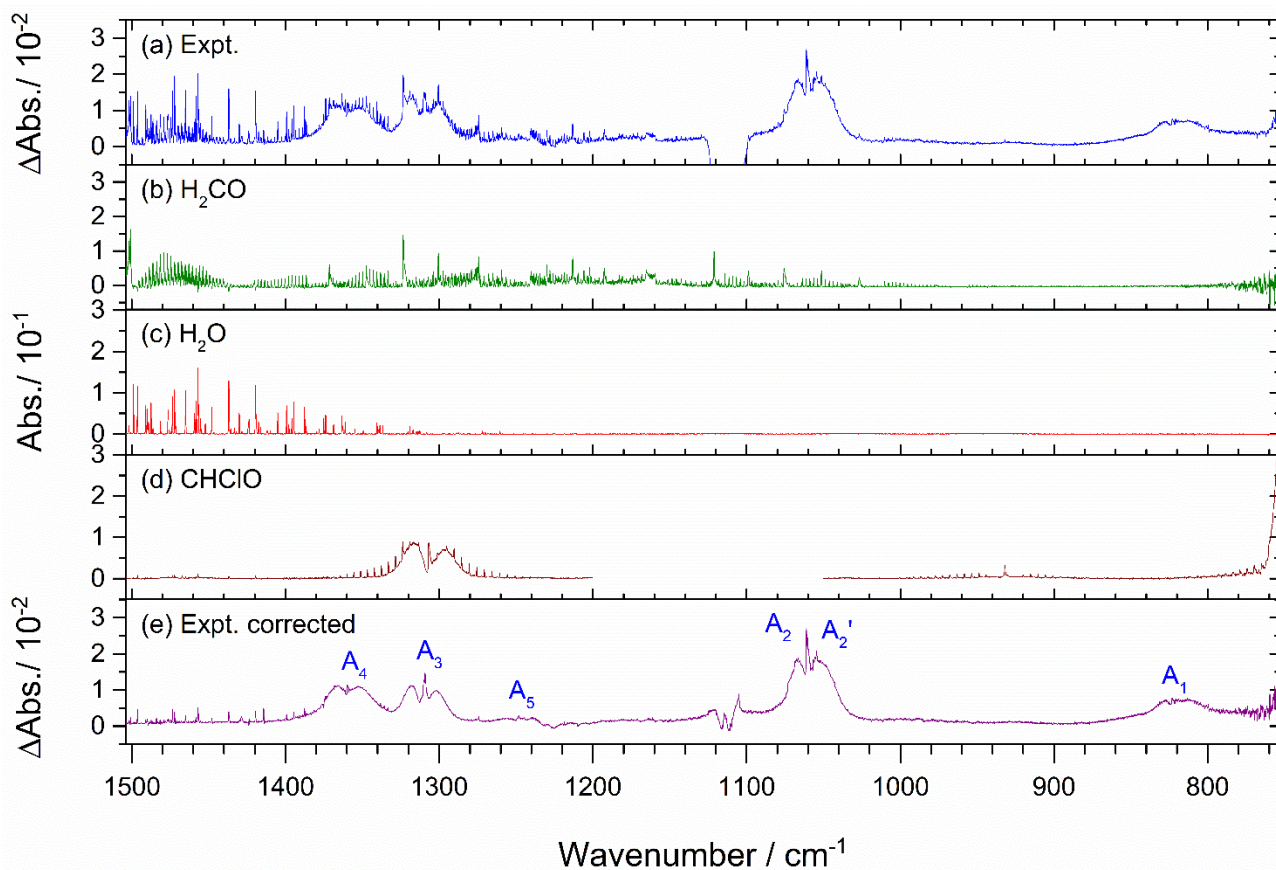

**Fig. S3** (a) Difference absorbance spectrum recorded upon 308-nm photolysis of a flowing mixture of  $\text{CH}_2\text{I}_2/\text{HCl}/\text{N}_2/\text{O}_2$  (0.12/0.6/54.0/46.0,  $P_T = 100.7$  Torr) by using continuous-scan mode at resolution  $0.25 \text{ cm}^{-1}$ . (b) IR spectrum of  $\text{H}_2\text{CO}$ . (c) IR spectrum of  $\text{H}_2\text{O}$  (d) IR spectrum of  $\text{CHClO}$ . (e) Processed spectrum with absorption of  $\text{H}_2\text{CO}$ ,  $\text{H}_2\text{O}$  and  $\text{CHClO}$  subtracted; features in group A are indicated.

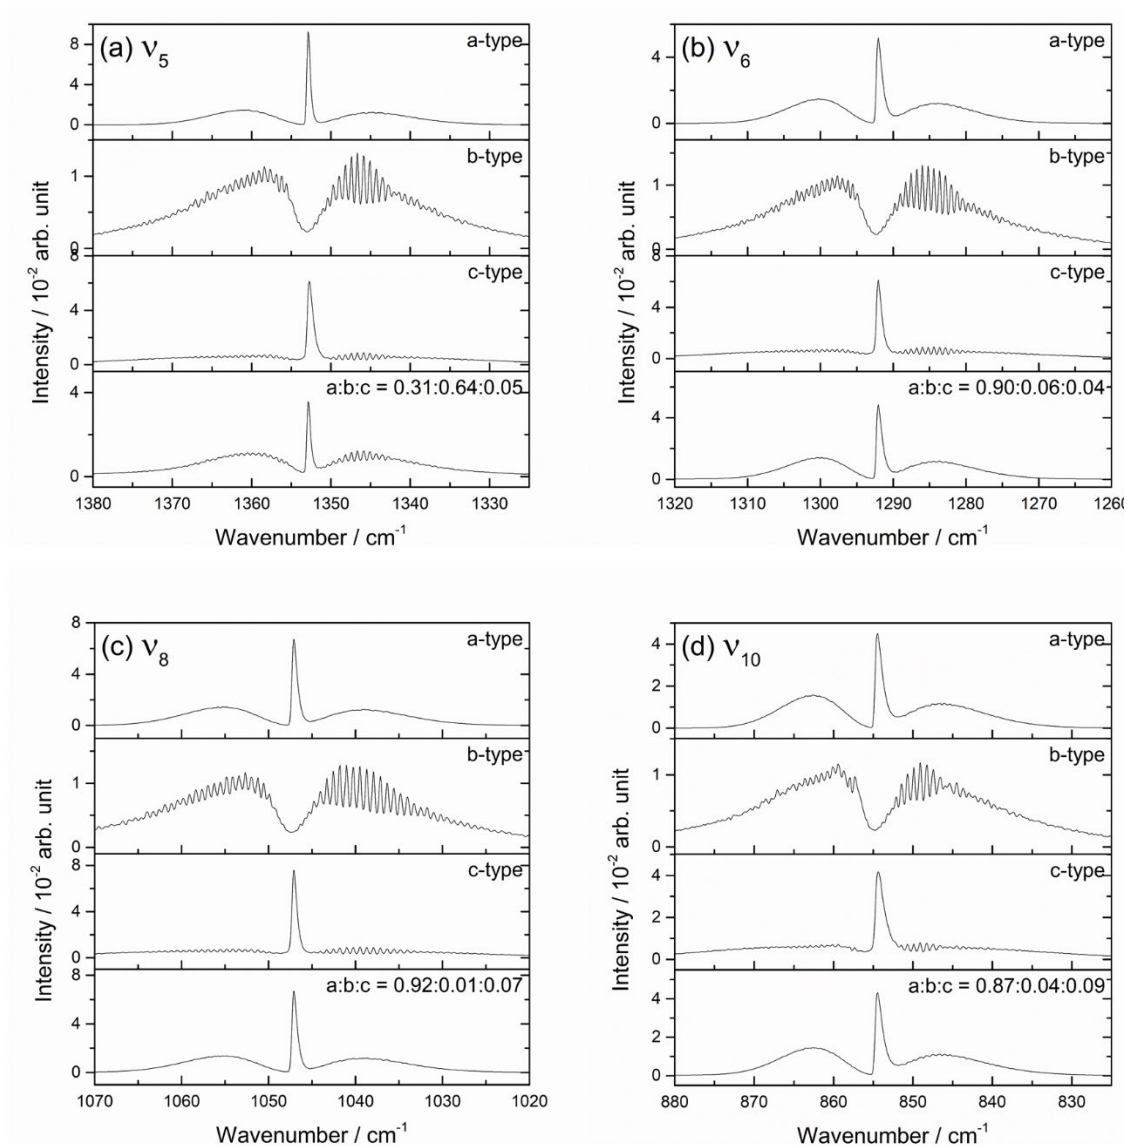

**Fig. S4** Simulated rotational contours for  $\nu_5$ ,  $\nu_6$ ,  $\nu_8$  and  $\nu_{10}$  modes of *gauche*-CMHP. Type *a*, type *b*, type *c*, and resultant rotational contours according to the weighting factors determined according to the projections of the predicted dipole derivatives onto axes *a*, *b* and *c* are shown.

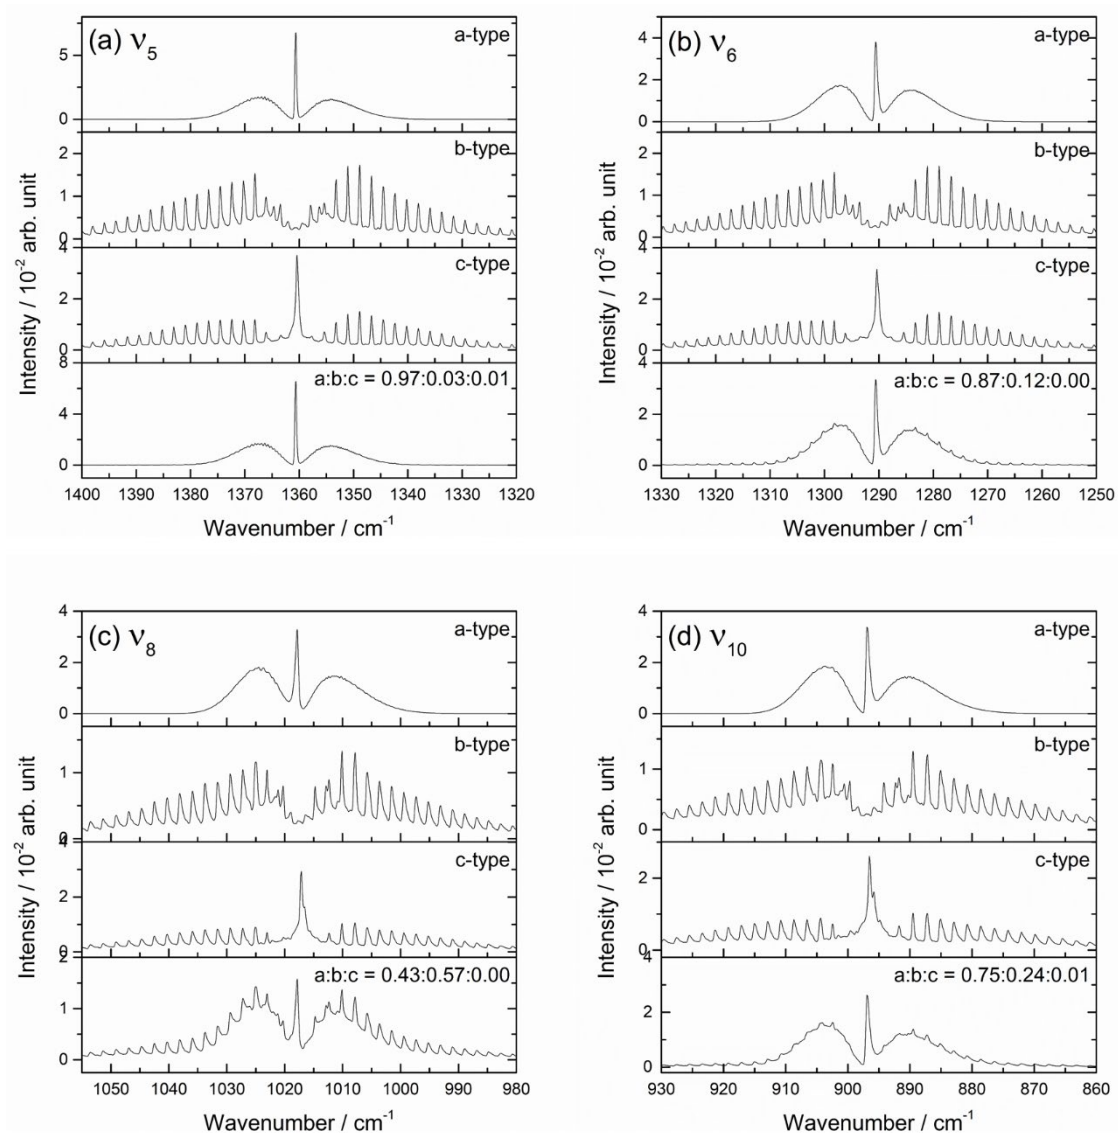

**Fig. S5** Simulated rotational contours for  $\nu_5$ ,  $\nu_6$ ,  $\nu_8$  and  $\nu_{10}$  modes of *anti*-CMHP. Type *a*, type *b*, type *c*, and resultant rotational contours according to the weighting factors determined according to the projections of the predicted dipole derivatives onto axes *a*, *b* and *c* are shown.



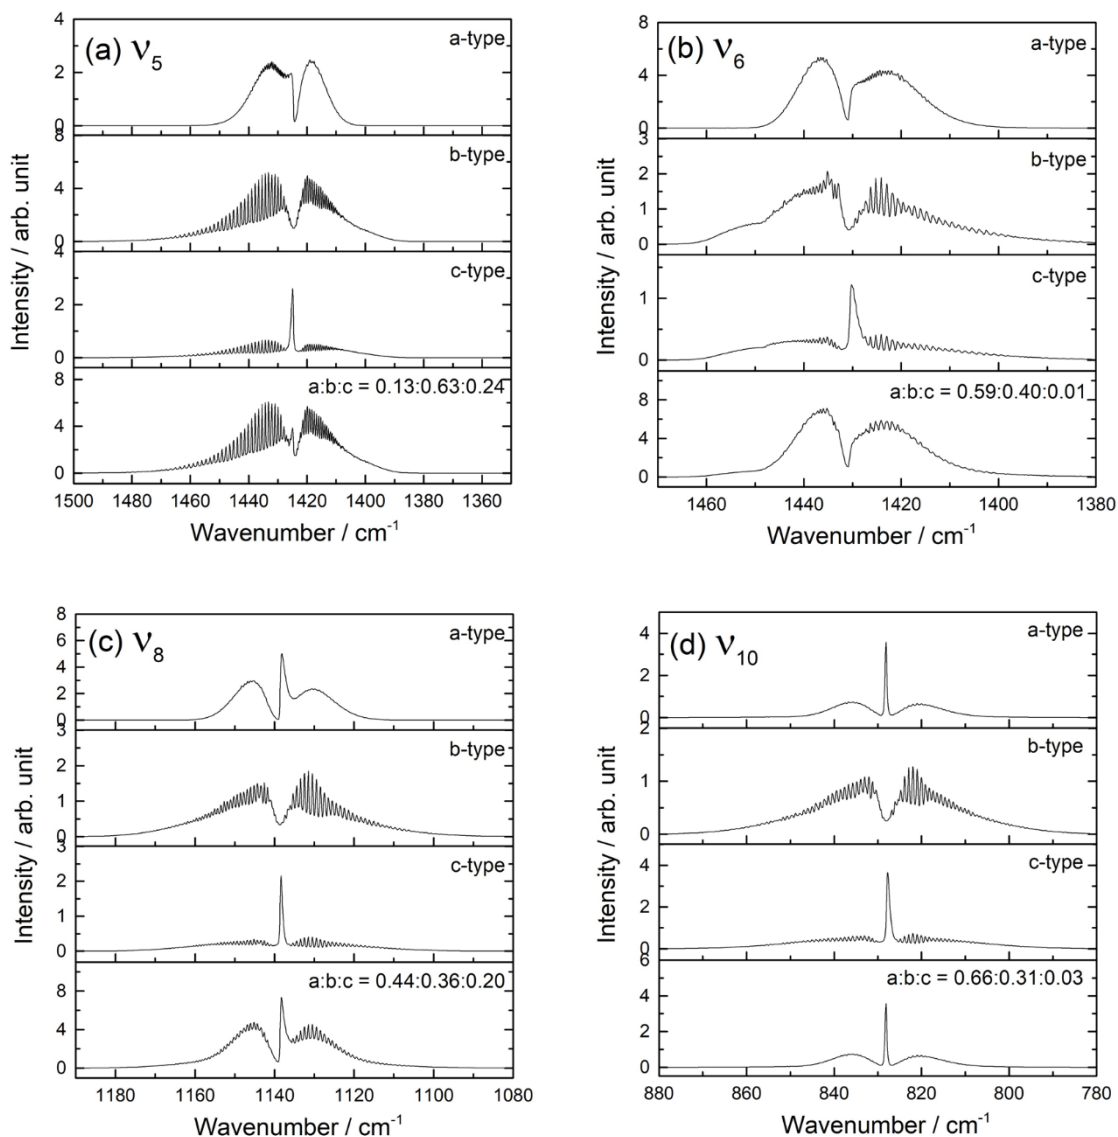

**Fig. S6** Simulated rotational contours for  $\nu_5$ ,  $\nu_6$ ,  $\nu_8$  and  $\nu_{10}$  modes of *gauche*-MCP. Type *a*, type *b*, type *c*, and resultant rotational contours according to the weighting factors determined according to the projections of the predicted dipole derivatives onto axes *a*, *b* and *c* are shown.

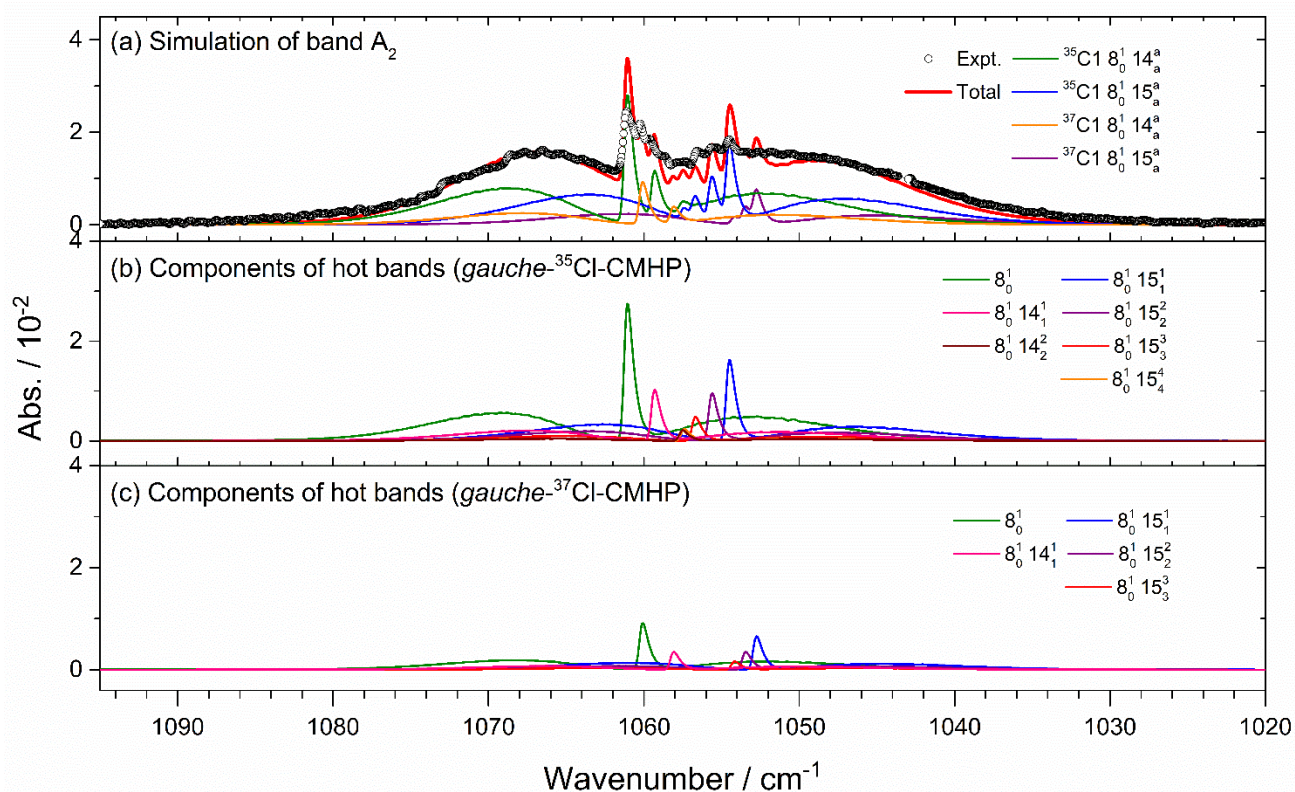

**Fig. S7** Spectral simulation of bands  $A_2$  and  $A_2'$ . (a) Comparison of experimental spectrum (open circle) with a simulated spectrum (thick red solid line); contributions from the fundamental bands ( $\nu_8$ ) of *gauche*- $^{35}\text{Cl}$ -CMHP and *gauche*- $^{37}\text{Cl}$ -CMHP and two series of hot bands are shown in thin lines (green for the fundamental band of *gauche*- $^{35}\text{Cl}$ -CMHP and hot bands from  $\nu_{14}$ , orange for the fundamental band of *gauche*- $^{37}\text{Cl}$ -CMHP and hot bands from  $\nu_{14}$ , and blue and purple for hot bands from  $\nu_{15}$ ). (b) Contributions of fundamental and hot bands of *gauche*- $^{35}\text{Cl}$ -CMHP. (c) Contributions from *gauche*- $^{37}\text{Cl}$ -CMHP. Instrumental resolution is  $0.25\text{ cm}^{-1}$ , which corresponds to spectral width  $0.32\text{ cm}^{-1}$  of simulation.



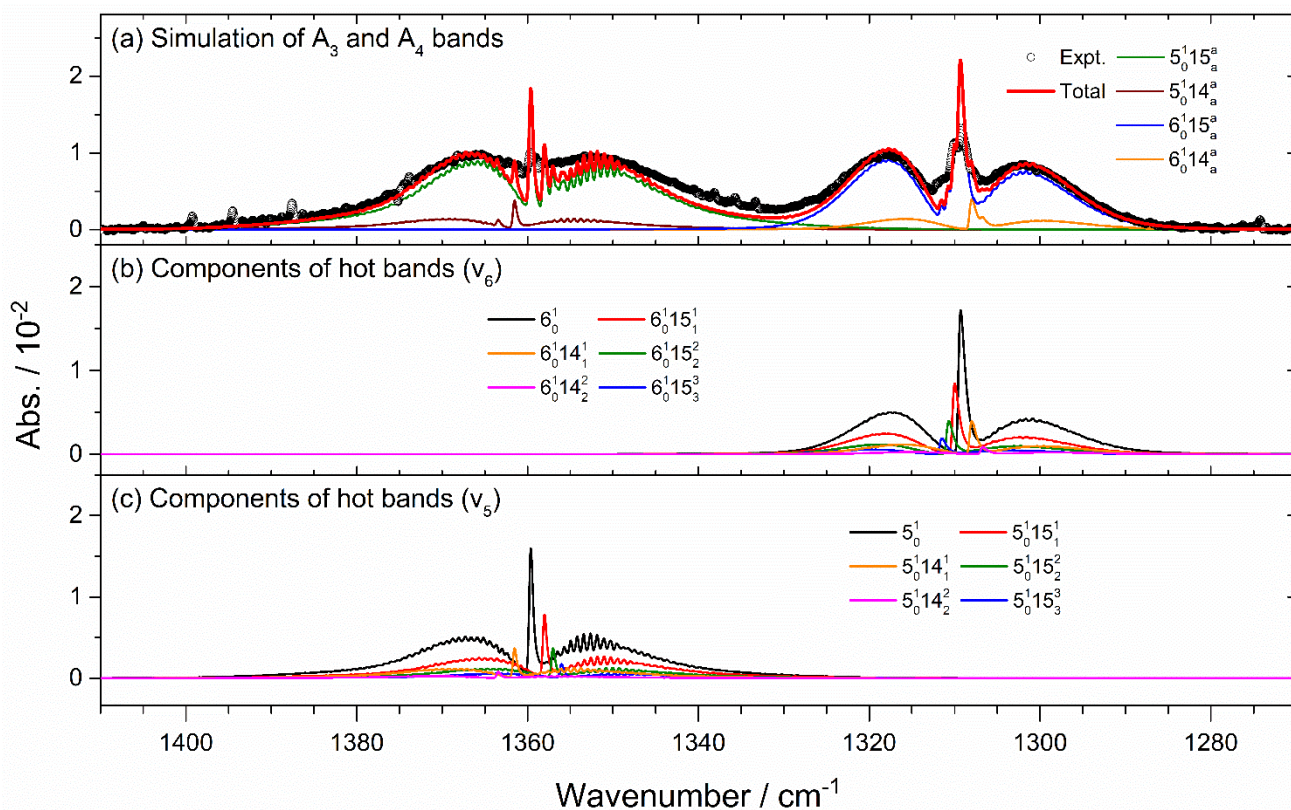

**Fig. S8** Spectral simulation of the  $A_3$  and  $A_4$  bands. (a) Comparison of experimental spectrum (open circle) with a simulated spectrum (thick red solid line); contributions from the fundamental bands ( $\nu_5$  and  $\nu_6$ ) of *gauche*- $^{35}\text{Cl}$ -CMHP and two series of hot bands are shown in thin lines (green for the fundamental band ( $\nu_5$ ) and hot bands from  $\nu_{15}$ , blue for the fundamental band ( $\nu_6$ ) and hot bands from  $\nu_{15}$ , and orange and purple for hot bands from  $\nu_{14}$ ). (b) Contributions of fundamental and hot bands of  $\nu_6$ . (c) Contributions of  $\nu_5$ . Instrumental resolution is  $0.25\text{ cm}^{-1}$ , which corresponds to spectral width  $0.32\text{ cm}^{-1}$  of simulation.

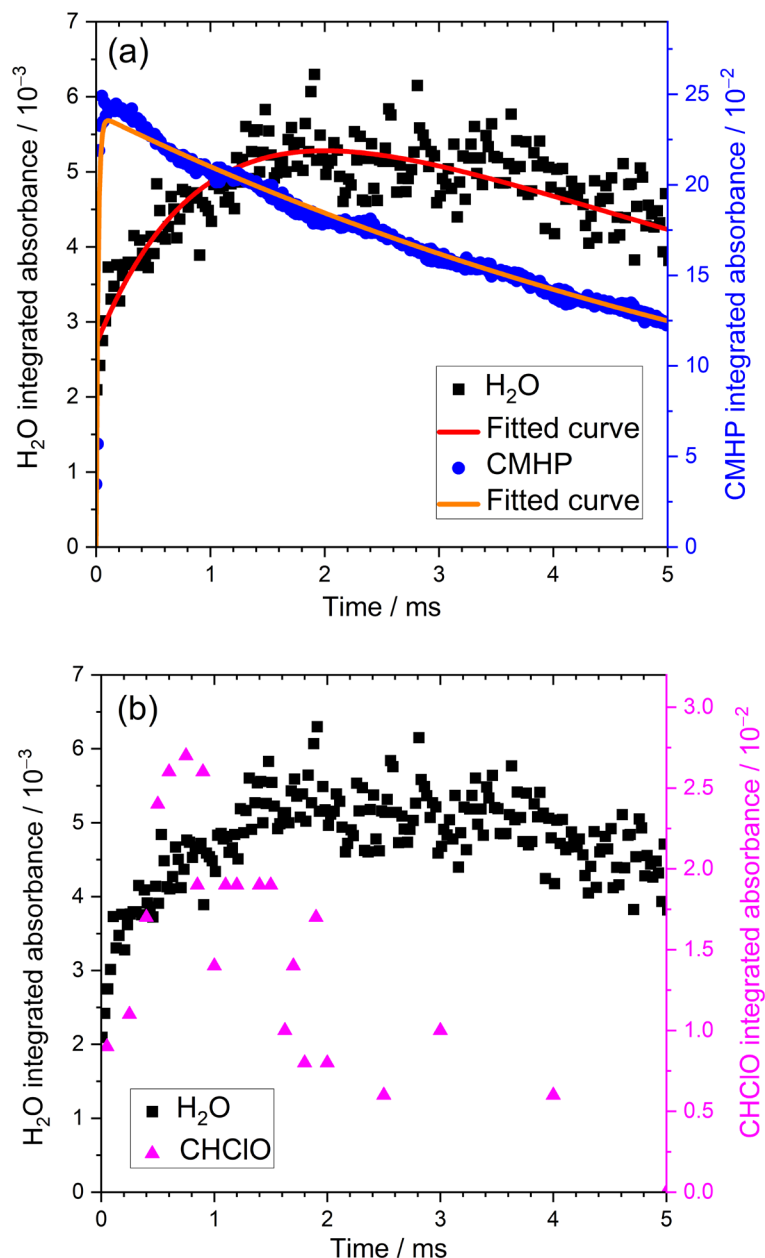

**Fig. S9** Temporal profiles of *gauche*-CMHP,  $\text{H}_2\text{O}$ , and  $\text{CHClO}$  obtained on integration over regions 1030–1085, 1557–1560, and 1758–1810  $\text{cm}^{-1}$ , respectively, of the difference spectra recorded on photolysis at 308 nm of a flowing mixture of  $\text{CH}_2\text{I}_2/\text{HCl}/\text{N}_2/\text{O}_2$  (0.08/0.04/51.7/49.2, 101.0 Torr, 298 K). (a) Measured temporal profiles of CMHP (blue circles) and  $\text{H}_2\text{O}$  (black squares) with the fitted curves. (b) Comparison of the temporal profiles of  $\text{H}_2\text{O}$  (black squares) and  $\text{CHClO}$  (pink triangles; the data of  $\text{CHClO}$  have large uncertainties because of the severe interference from absorption of  $\text{H}_2\text{CO}$ ).

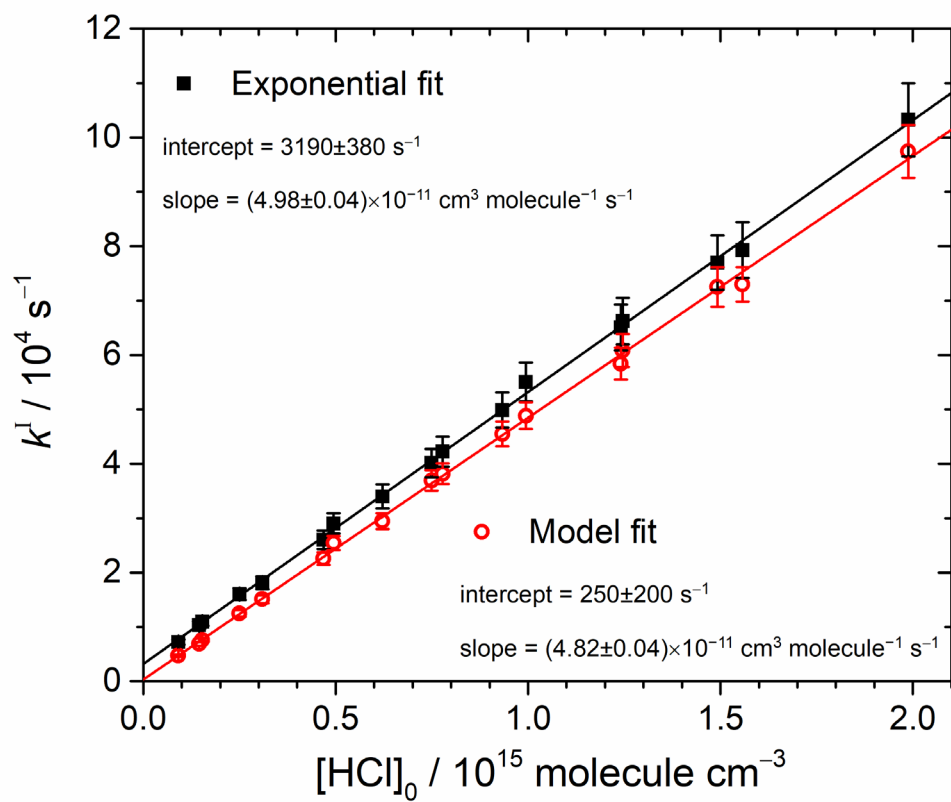

**Fig. S10** Comparison of plots of  $k^1$  vs.  $[\text{HCl}]_0$  derived from model fit and single-exponential fit.

## References

1. C. M. Western, "PGOPHER, a Program for Simulating Rotational Structure," <http://pgopher.chm.bris.ac.uk/>.
2. C. Cabezas and Y. Endo, *Chem. Phys. Chem.*, 2017, **18**, 1860–1863.
3. W.-L. Ting, C.-H. Chang, Y.-F. Lee, H. Matsui, Y.-P. Lee and J. J.-M. Lin, *J. Chem. Phys.*, 2014, **141**, 104308.
4. S. Enami, J. Ueda, M. Goto, Y. Nakano, S. Aloisio, S. Hashimoto and M. Kawasaki, *J. Phys. Chem. A*, 2004, **108**, 6347–6350.
5. Y.-T. Su, H.-Y. Lin, R. Putikam, H. Matsui, M. C. Lin and Y.-P. Lee, *Nat. Chem.*, 2014, **6**, 477–483.
6. P.-L. Luo, Y. Endo and Y.-P. Lee, *J. Phys. Chem. Lett.*, 2018, **9**, 4391–4395.
7. R. Atkinson, D. L. Baulch, R. A. Cox, J. N. Crowley, R. F. Hampson, Jr., R. G. Hynes, M. E. Jenkin, M. J. Rossi and J. Troe, *Atmos. Chem. Phys.*, 2007, **7**, 981–1191.
8. T. J. Gravestock, M. A. Blitz, W. J. Bloss and D. E. Heard, *ChemPhysChem*, 2010, **11**, 3928–3941.
